# Supplementary material
Source: PubMed Central journal article supplement (PMC4972572)
Supplement: NIHMS4085-supplement-1.pdf [file NIHMS4085-supplement-1.pdf]

## Supplementary Information

a

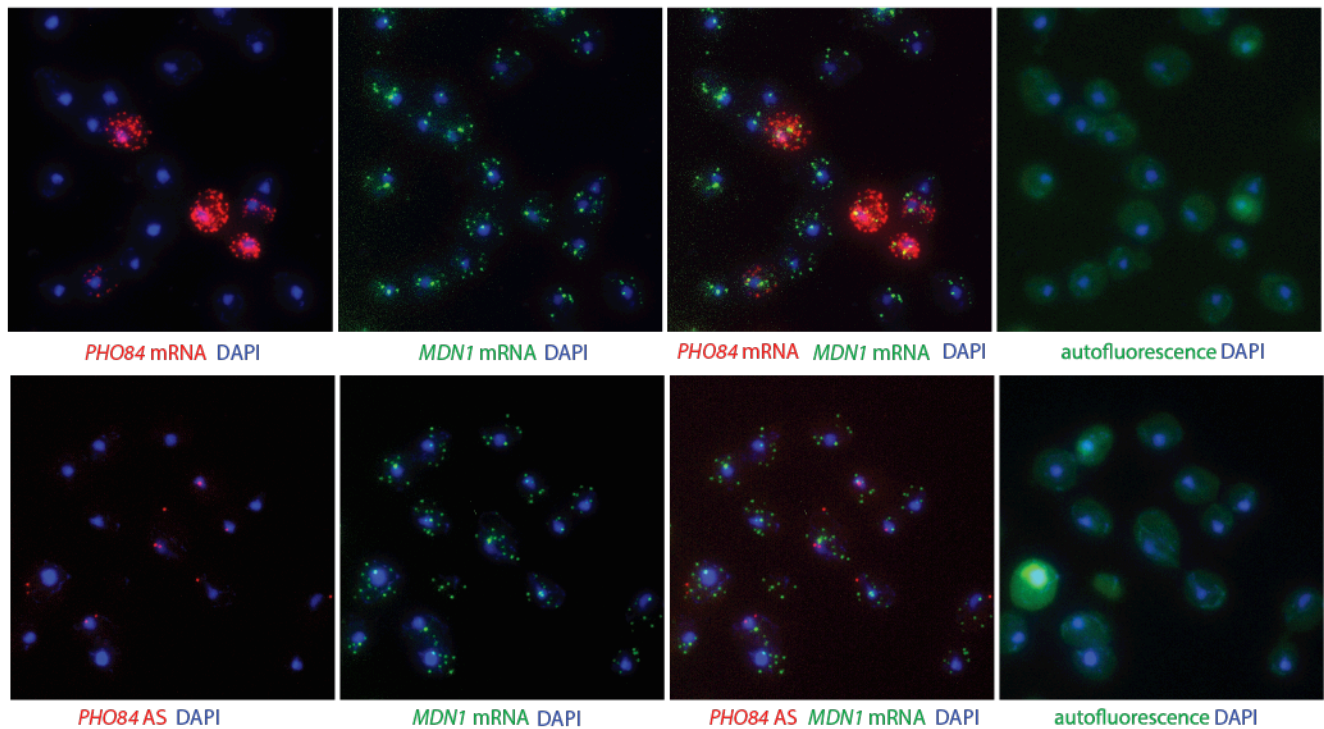

b

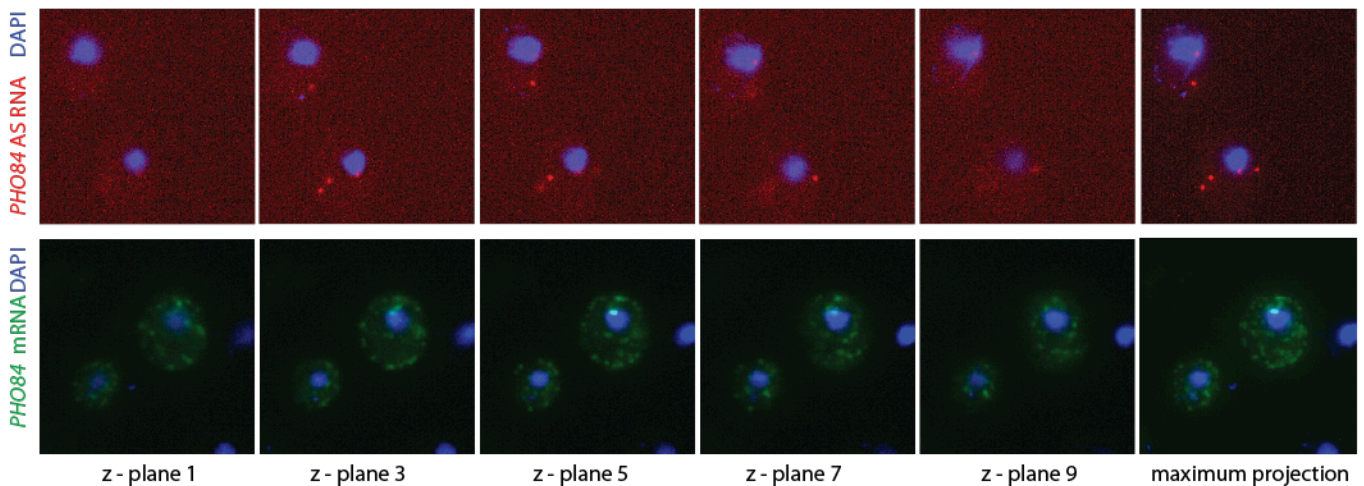**Supplementary Figure 1:** smFISH of *MDN1* mRNAs and *PHO84* nascent transcripts.

**a)** *MDN1* mRNAs are detected in all cells, also in *PHO84* sense and/or *PHO84* AS RNA negative cells. smFISH using probes against *PHO84* sense (upper panel) or *PHO84* AS RNAs (lower panel) and *MDN1* mRNAs were performed as shown in Figure 1. Nuclear DNA is stained using DAPI, cellular autofluorescence in the GFP channel is used to show the cellular boundaries. **(b)** *PHO84* sense and AS RNA loci are always located at nuclear periphery, consistent with the location of the *PHO84* gene close to the subtelomeric region of Chromosome XIII. Different z-sections as well as the maximum projected image are shown. Images were acquired in 200nm steps, only every second z-plane is shown. Importantly, RNA signals are rarely observed in the nucleus, except at the site of transcription, suggesting that RNA nuclear export is fast.

**a**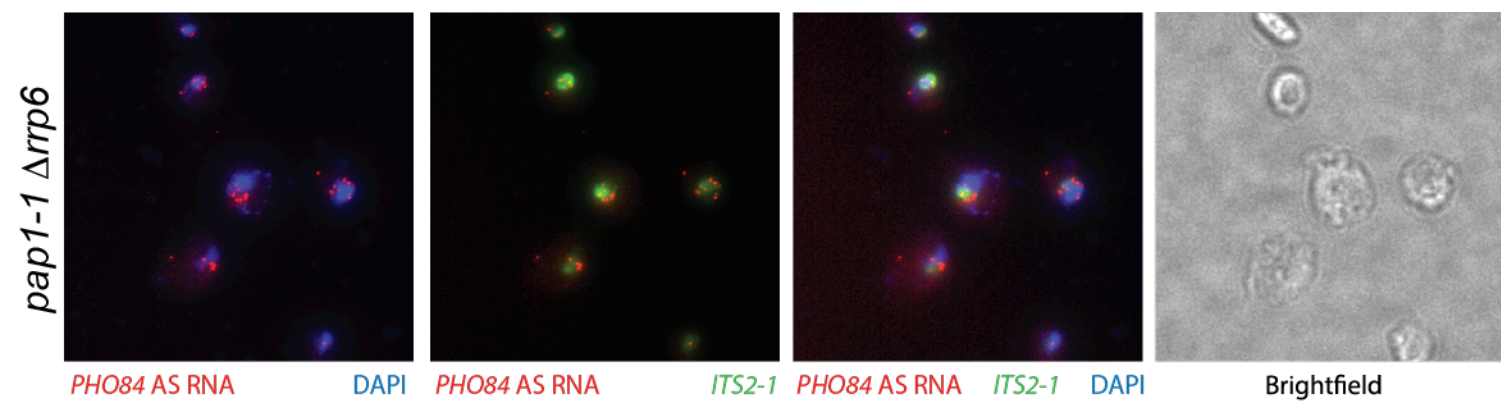**b**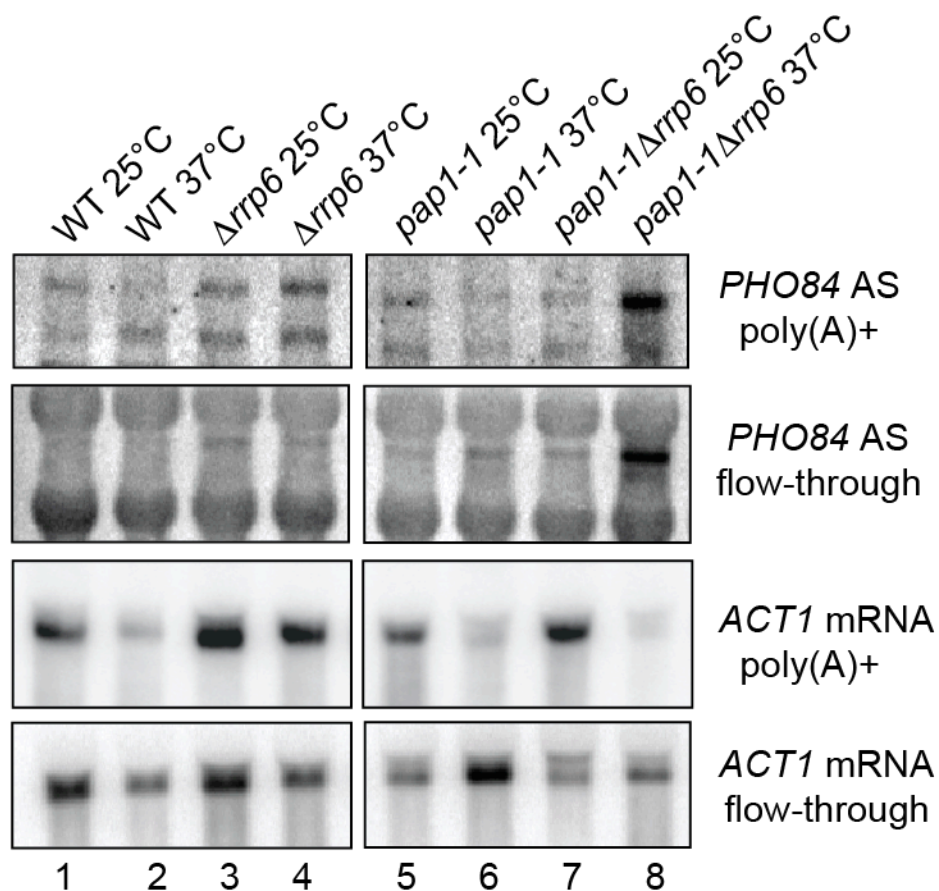

**Supplementary Figure 2: PHO84 AS RNAs are polyadenylated by Pap1.**

**(a)** *PHO84* AS RNAs frequently accumulate in the nucleolus in a *pap1-1Δrrp6* strain after 1h at 37°C. *pap1-1Δrrp6* cells were grown at 25°C in SD complete and shifted to 37°C for 1h prior to fixation followed by hybridization of *PHO84* AS (red) and probes against the ribosomal pre-rRNA spacer sequence *ITS2-1* (green) as a molecular marker. Nuclear DNA was stained using DAPI (blue) and cellular outlines were visualized by brightfield imaging.

**(b)** In the absence of Pap1, *PHO84* AS RNAs are polyadenylated and degraded by the surveilling exosome, presumably following polyadenylation by Trf4/5. Northern blot membranes with oligo dT purified poly(A)+ RNA or polyA minus (flow-through) from the indicated strains grown at 25°C or shifted to 37°C for 1h were hybridized with *PHO84* AS specific probes as described in Figure 1. Membranes were rehybridized with *ACT1* random labelled probes to control for equal loading and for phenotype. In *pap1-1* at 37°C, *ACT1* mRNA is reduced in level probably due to the defect in 3' end formation.

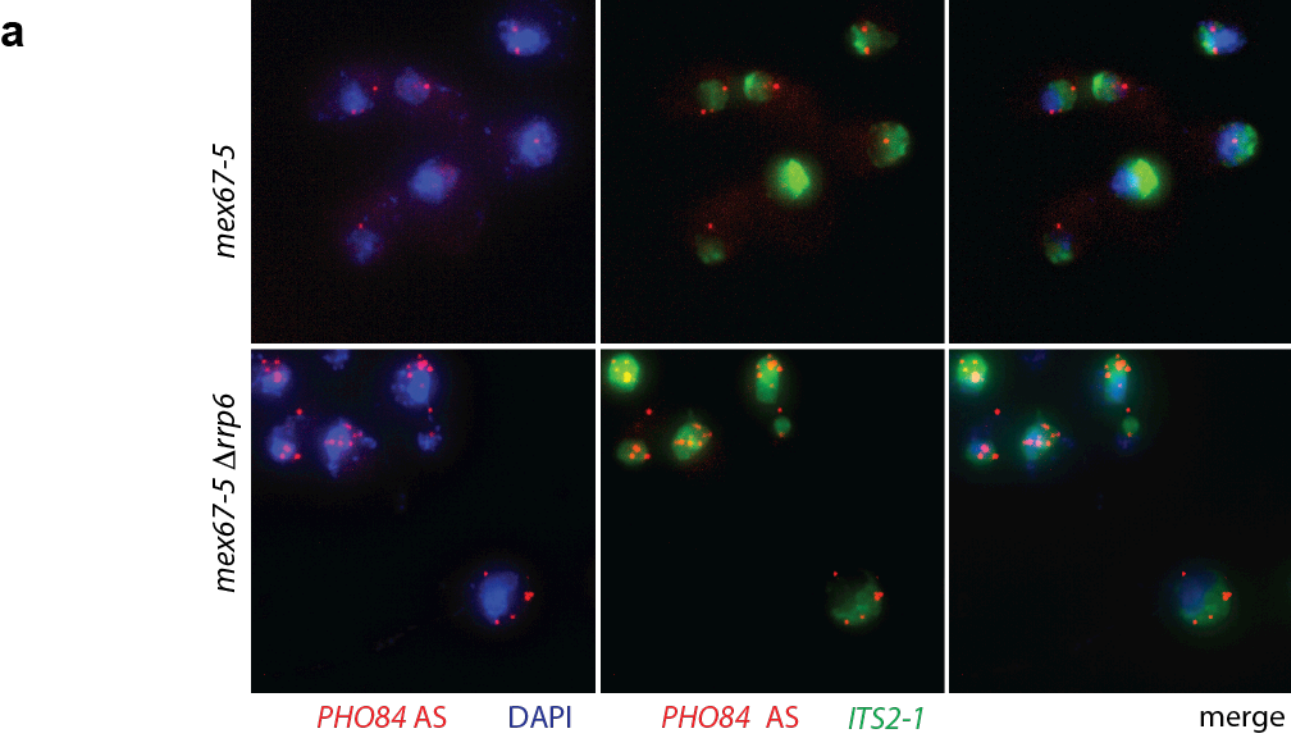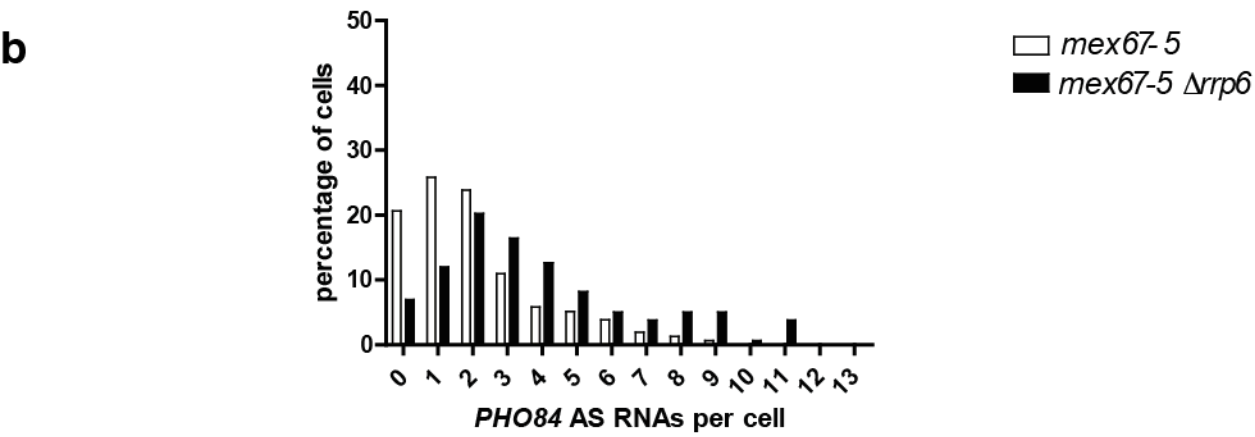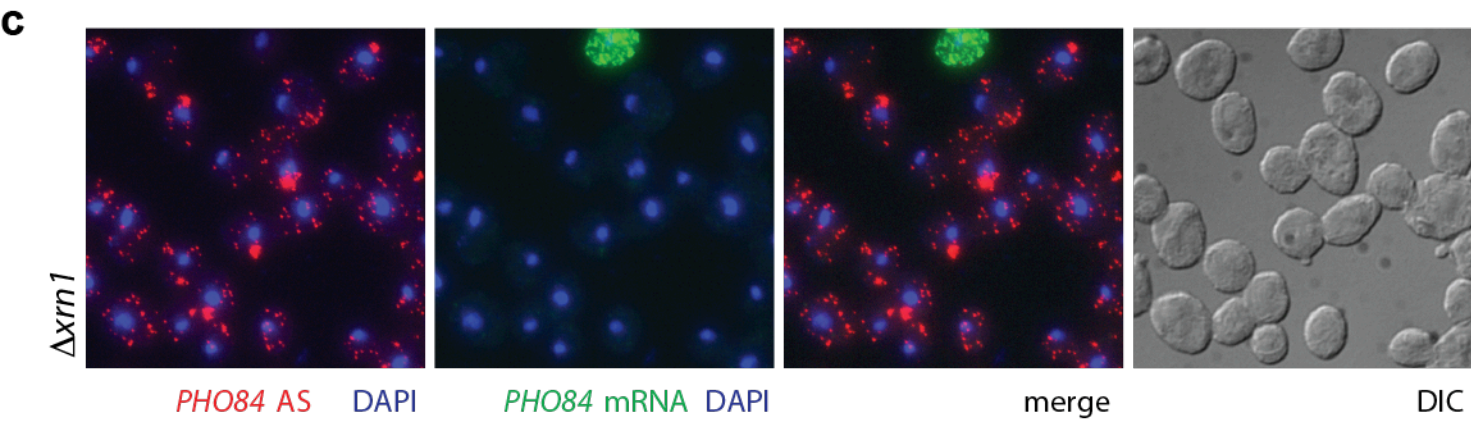

**Supplementary Figure 3: *PHO84* AS RNAs have mRNA-like properties.**

**(a)** *PHO84* AS RNAs are exported to the cytoplasm by the mRNA export receptor Mex67. *mex67-5* and *mex67-5 Δrrp6* cells were grown at 25°C in SD complete and shifted to 37°C for 1 hour prior to fixation followed by hybridization with *PHO84* AS probes as shown in Figure 1c. The nucleolus was stained using a *ITS2-1* probe (green), and nuclear DNA visualized by DAPI stain (blue).

**(b)** Frequency distribution of *PHO84* AS RNA expression levels after 1 hour heat shock at 37°C in *mex67-5* and *mex67-5 Δrrp6* cells. The numbers of *PHO84* AS RNAs were determined for > 100 cells.

**(c)** *PHO84* AS RNAs are degraded in the cytoplasm in an Xrn1 dependent manner.  $\Delta xrn1$  cells were grown in SD complete medium at 25°C, fixed and hybridized with FISH probes complementary to *PHO84* sense and AS RNAs as shown in Figure 1c.

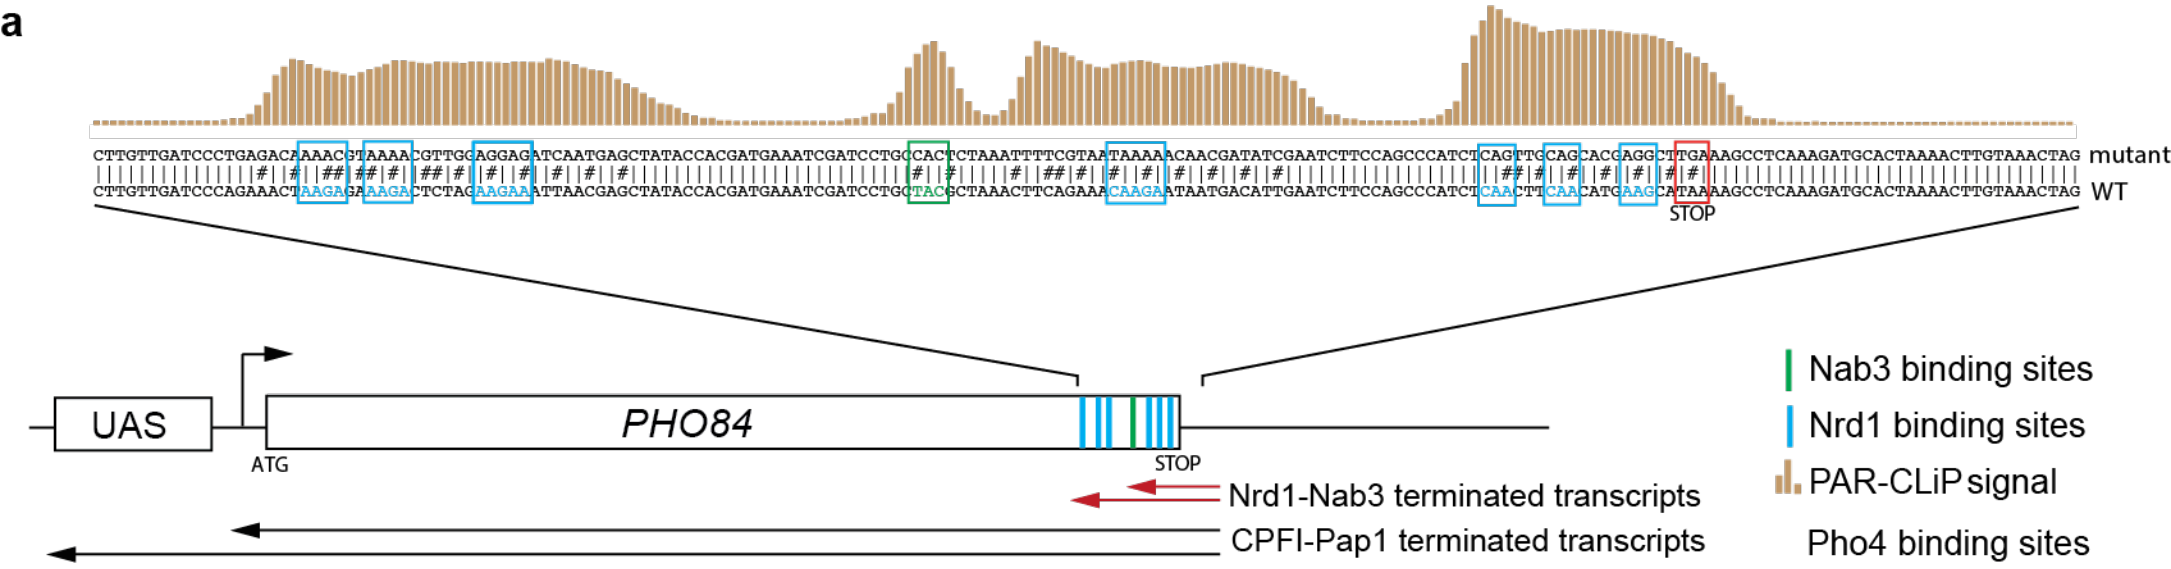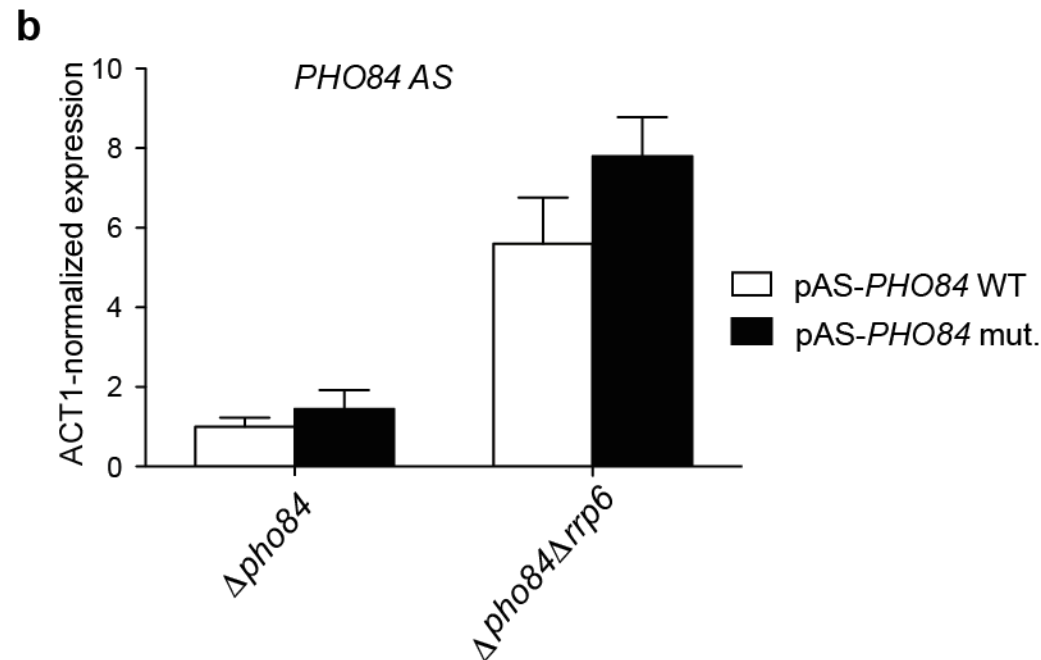

**Supplementary Figure 4: Nrd1-Nab3 binding site mutations increase AS RNA production.**

(a) Schematic view of the mutagenesis of Nrd1 and Nab3 binding sites at the *PHO84* 3' end. WT and mutated sequences are reported in the scheme. The Nrd1 PAR-CLiP signal detected over the same region (Creamer et al., 2011)<sup>45</sup> is indicated above. The 3' ends of early terminated *PHO84* AS transcripts have been described (Neil et al., 2009)<sup>1</sup>. (b) Analysis of *PHO84* AS RNA levels in a  $\Delta$ pho84 strain transformed with a wild-type *PHO84* plasmid (pAS-*PHO84* WT) or a mutant *PHO84* plasmid (pAS-*PHO84* mut.) on which Nrd1-Nab3 motifs on the AS orientation are mutagenized. Plasmid encoded *PHO84* AS transcripts were measured by RT-qPCR with specific primers as described in Methods.

**a**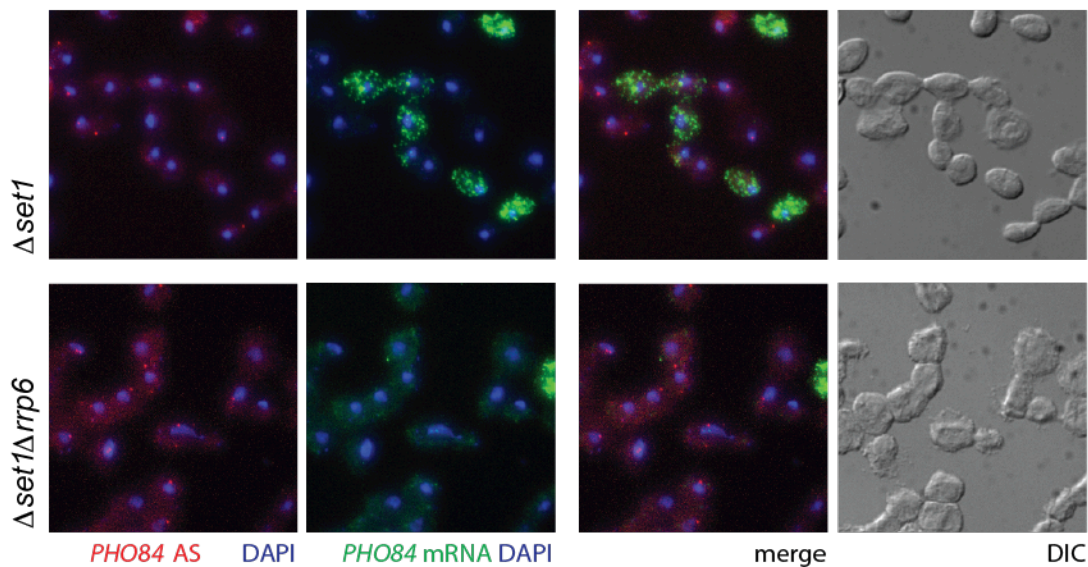**b**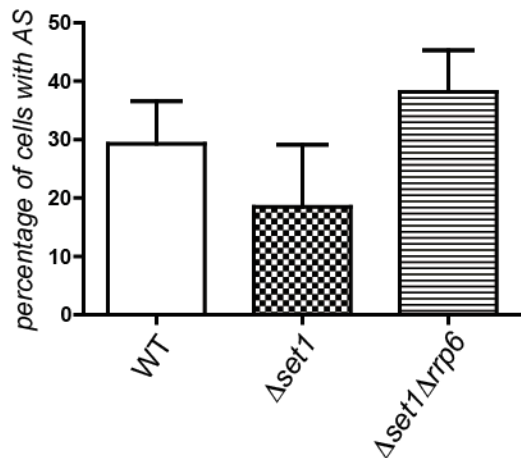

**Supplementary Figure 5:** Opposite effects of Set1 and Rrp6 on *PHO84* AS RNA levels.

**(a)** smFISH for *PHO84* sense and AS RNA in  $\Delta set1$  and  $\Delta set1\Delta rrp6$  cells. Cells were grown, fixed and hybridized to probes specific for *PHO84* sense (green) and AS RNAs (red) as shown in Figure 1c.

**(b)** Percentage of cells expressing *PHO84* AS RNA in individual cells of the indicated strains.

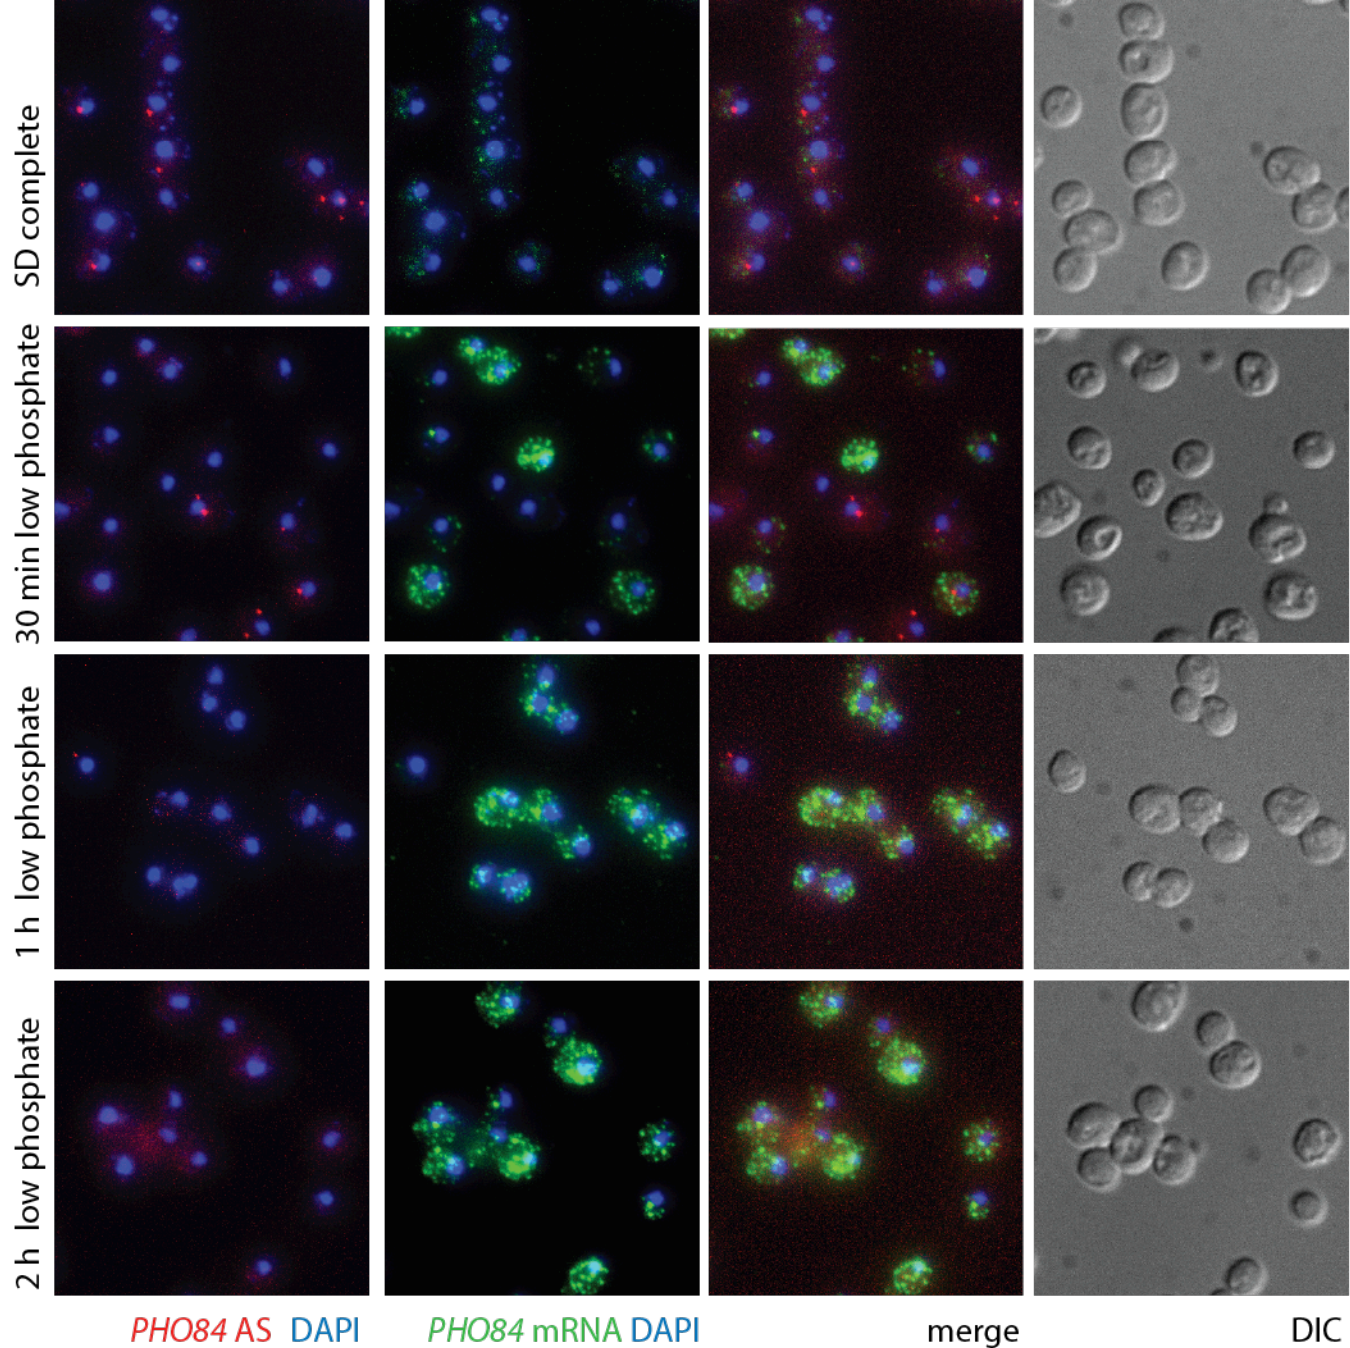

**Supplementary Figure 6:** Low phosphate medium prevents *PHO84* AS RNA expression.

Strong induction of *PHO84* sense transcription in low phosphate medium prevents *PHO84* antisense expression. Cells were grown in SD complete medium and shifted to low phosphate medium for 0.5, 1 and 2 hours prior to fixation. smFISH is shown in green for *PHO84* sense and red for *PHO84* AS RNAs. DNA was stained using DAPI (blue) and cellular outlines were visualized using DIC optics.

|               | Mean number of total <i>PHO84</i> AS RNAs per cell | Half-life (min) measured by 1,10 Phenanthroline induced transcription inhibition | Transcription frequency (RNAs/hour) |
|---------------|----------------------------------------------------|----------------------------------------------------------------------------------|-------------------------------------|
| Wild type     | 0.36±0.098                                         | 11.4±3.9                                                                         | 1.31                                |
| $\Delta rrp6$ | 0.82±0.18                                          | 12±2.8                                                                           | 2.84                                |

**Supplementary Table 1: Transcription frequency in wild-type and  $\Delta rrp6$  cells.** mRNA half-life was calculated using mean *PHO84* AS expression levels in wild-type and  $\Delta rrp6$  strains measured by smFISH and decay rates measured by qRT-PCR after transcription shutoff by 1,10 Phenanthroline. Assuming mRNA decay follows first-order kinetics, transcription frequency can be calculated using (Holstege et al. 1998; Wang et al. 2002)<sup>56,57</sup> :

Transcription frequency =  $\ln 2 \times (\text{steady state RNA level}) / \text{half life (min)}$

**Supplementary Table 2**

**STRAINS USED IN THIS STUDY**

| Code                     | Name                       | Genotype                                                                | Reference                                      |
|--------------------------|----------------------------|-------------------------------------------------------------------------|------------------------------------------------|
| <i>W303 background</i>   |                            |                                                                         |                                                |
| FSY1742                  | WT                         | <i>MATa ade2 his3 leu2 trp1 ura3</i>                                    |                                                |
| FSY3117                  | <i>Δrrp6</i>               | <i>MATa ade2 his3 leu2 trp1 ura3 Δrrp6::Kanr</i>                        | Camblong et al., 2007 <sup>34</sup>            |
| FSY3518                  | <i>Δhda2</i>               | <i>MATa ade2 his3 leu2 trp1 ura3 Δhda2::TRP1</i>                        | Camblong et al., 2007 <sup>34</sup>            |
| FSY3018                  | <i>Δhda2Δrrp6</i>          | <i>MATa ade2 his3 leu2 trp1 ura3 Δrrp6::Kanr Δhda2::TRP1</i>            | this study                                     |
| FSY3517                  | <i>Δset1</i>               | <i>MATa ade2 his3 leu2 trp1 ura3 Δset1::TRP1</i>                        | this study                                     |
| FSY3833                  | <i>Δset1Δrrp6</i>          | <i>MATa ade2 his3 leu2 trp1 ura3 Δrrp6::Kanr Δset1::TRP1</i>            | this study                                     |
| FSY1982                  | <i>mex67-5</i>             | <i>MATa ade2 his3 leu2 trp1 ura3 mex67-5 integrated</i>                 | Jimeno et al., 2002 <sup>58</sup>              |
| FSY1985                  | <i>mex67-5 Δrrp6</i>       | <i>MATa ade2 his3 leu2 trp1 ura3 mex67-5 integrated Δrrp6::Kanr</i>     | this study                                     |
| FSY2078                  | <i>Δxrn1</i>               | <i>MATa ade2 his3 leu2 trp1 ura3 Δxrn1::RP1</i>                         | Jensen T.H. lab                                |
| FSY1968                  | <i>pap1-1</i>              | <i>MATa ade2 his3 leu2 trp1 ura3 pap1-1</i>                             | Jensen T.H. lab                                |
| FSY1988                  | <i>pap1-1 Δrrp6</i>        | <i>MATa ade2 his3 leu2 trp1 ura3 pap1-1 Δrrp6::Kanr</i>                 | Libri D. lab                                   |
| FSY4838                  | <i>pap1-1 Δtrf4</i>        | <i>MATa ade2 his3 leu2 trp1 ura3 pap1-1 Δtrf4::</i>                     | Libri D. lab                                   |
| FSY4275                  | <i>GAL-NRD1</i>            | <i>MATa ade2 his3 leu2 trp1 ura3 HisMX6-pGAL-NRD1</i>                   | Thiebaut et al., 2006 <sup>7</sup>             |
| FSY4282                  | <i>GAL-NRD1 Δrrp6</i>      | <i>MATa ade2 his3 leu2 trp1 ura3 HisMX6-pGAL-NRD1 Δrrp6::Kanr</i>       | Thiebaut et al., 2006 <sup>7</sup>             |
| FSY2527                  | <i>Dpho4</i>               | <i>MATa ade2 his3 leu2 trp1 ura3 Dpho4::Kanr</i>                        | this study                                     |
| FSY3313                  | <i>Dpho4 Δrrp6</i>         | <i>MATa ade2 his3 leu2 trp1 ura3 Dpho4::Kanr Δrrp6::TRP1</i>            | this study                                     |
| FSY4265                  | <i>Dpho4 Δset1</i>         | <i>MATa ade2 his3 leu2 trp1 ura3 Dpho4::Kanr Δset1::HIS3</i>            | this study                                     |
| FSY4266                  | <i>Dpho4 Δset1 Δrrp6</i>   | <i>MATa ade2 his3 leu2 trp1 ura3 Dpho4::Kanr Δset1::HIS3 Δrrp6::TRF</i> | this study                                     |
| FSY4911                  | <i>NRD1-HA Dpho4</i>       | <i>MATa ade2 his3 leu2 trp1 ura3 NRD1-HA-HIS3 Dpho4::Kanr</i>           | this study                                     |
| FSY4918                  | <i>NRD1-HA Dpho4 Δrrp6</i> | <i>MATa ade2 his3 leu2 trp1 ura3 NRD1-HA-HIS3 Dpho4::Kanr Δrrp6::TR</i> | this study                                     |
| FSY4912                  | <i>NRD1-HA Dpho4 Δset1</i> | <i>MATa ade2 his3 leu2 trp1 ura3 NRD1-HA-HIS3 Dpho4::Kanr Δset1::TR</i> | this study                                     |
| FSY4841                  | <i>rpb1-1</i>              | <i>MATa ade2 his3 leu2 trp1 ura3 rpb1-1</i>                             | Libri D. lab                                   |
| FSY4842                  | <i>rpb1-1 Δrrp6</i>        | <i>MATa ade2 his3 leu2 trp1 ura3 rpb1-1 Δrrp6::URA3</i>                 | Libri D. lab                                   |
| FSY3799                  | <i>Dpho84</i>              | <i>MATa ade2 his3 leu2 trp1 ura3 Dpho84::Kanr</i>                       | Camblong et al., 2009 <sup>48</sup>            |
| FSY3811                  | <i>Dpho84 Δrrp6</i>        | <i>MATa ade2 his3 leu2 trp1 ura3 Dpho84::Kanr Δrrp6::TRP1</i>           | Camblong et al., 2009 <sup>48</sup>            |
| <i>BY4741 background</i> |                            |                                                                         |                                                |
| FSY3158                  | WT                         | <i>MATa his3 leu2 lys2 ura3</i>                                         | Euroscarf                                      |
| FSY4747                  | <i>Δrrp6</i>               | <i>MATa his3 leu2 lys2 ura3 Δrrp6::NatMX</i>                            | Houseley J. & Tollervey D. (2006) <sup>5</sup> |
| FSY3182                  | <i>Δtrf4</i>               | <i>MATa ade2 his3 leu2 ura3 Δtrf4::Kanr</i>                             | -                                              |
| FSY4748                  | <i>Δtrf4 Δrrp6</i>         | <i>MATa ade2 his3 leu2 ura3 Δtrf4::Kanr Δrrp6::NatMX</i>                | -                                              |
| FSY4749                  | <i>Δtrf4 GAL-TRF5</i>      | <i>MATa ade2 his3 leu2 ura3 Δtrf4::Kanr HisMX6-pGAL-3HA::trf5</i>       | -                                              |

**PRIMERS USED IN THIS STUDY**

| Code    | Name                      | Sequence                                   |
|---------|---------------------------|--------------------------------------------|
| OFS1741 | ACT1 F Mid                | 5'-TTCCAGCCTTCTACGTTTCCATC-3'              |
| OFS1742 | ACT1 R Mid                | 5'-CGTAGAGGTAGAGAAACAGC-3'                 |
| OFS735  | ACT1 F 3'                 | 5'-TACTCCGCTCGATTGGTGGT-3'                 |
| OFS736  | ACT1 R 3'                 | 5'-GGTGAACGATAGATGGACCACTT-3'              |
| OFS737  | ACT1 F 5'                 | 5'-TGATATGTTCTAGCGCTTGGAC-3'               |
| OFS738  | ACT1 R 5'                 | 5'-GTCAATATAGAGGTTATGCGAGAGTG-3'           |
| OFS1077 | PHO84 F 3'                | 5'-GAAATTAACGAGTATACCCAGATGAAATC-3'        |
| OFS1078 | PHO84 R 3'                | 5'-CATGTTGAAAGTTGAGATGGGCTGG-3'            |
| OFS1158 | PHO84 F M                 | 5'-CTGCCGACAAAGCAAGATGG-3'                 |
| OFS1159 | PHO84 F M                 | 5'-TTTGAGGATGATGTCAGAGAGATTCG-3'           |
| OFS1075 | PHO84 F 5'                | 5'-CCGTCAATAAAGATACTATTATGTTGCTG-3'        |
| OFS1076 | PHO84 F 5'                | 5'-AAAATCAATCAAATGGTTGGAAAGGC-3'           |
| OFS1717 | SCR1 F                    | 5'-AACCCCTCTTCTCCGCTGAA-3'                 |
| OFS1718 | SCR1 R                    | 5'-CTACCTTGCCGACCAAGACA-3'                 |
| OFS1249 | PHO84 -1000 <i>Sall</i> F | 5'-GGGGGGGGGGTCCGACGAGATGATAAAGAGGGCGGT-3' |
| OFS1363 | PHO84 +355 <i>Sall</i> R  | 5'-GGGGGGGGGGTCCGACGCTCAAGTCTGCTTAGTCGA-3' |

**smFISH probes used in this study**

*PHO84* mRNA, *PHO84 AS* and *MDN1* probes were labeled in a single position with either Dylight 549 or DyLight 594  
*ITS2-1* probe was labeled in 3 positions with cy5 (Zenklusen et al., 2008). Labeled positions are shown in bold.

| <i>PHO84</i> sense                                                                                                                                                                                                                                                                                                                                                                                                                                                                                                                                                                                                                                                                                                                      | <i>PHO84 AS</i>                                                                                                                                                                                                                                                                                                                                                                                                                                                                                                                                                                                                                                                                                                                                                     | <i>ITS2-1</i>                                                    | <i>MDN1</i>                                                                                                                                                                                                                                                                                                                                                                                                                                                                                                                                                                                                                                                                                                                                                                                                                                                                                                                                                                                                                                                                                                                                               |
|-----------------------------------------------------------------------------------------------------------------------------------------------------------------------------------------------------------------------------------------------------------------------------------------------------------------------------------------------------------------------------------------------------------------------------------------------------------------------------------------------------------------------------------------------------------------------------------------------------------------------------------------------------------------------------------------------------------------------------------------|---------------------------------------------------------------------------------------------------------------------------------------------------------------------------------------------------------------------------------------------------------------------------------------------------------------------------------------------------------------------------------------------------------------------------------------------------------------------------------------------------------------------------------------------------------------------------------------------------------------------------------------------------------------------------------------------------------------------------------------------------------------------|------------------------------------------------------------------|-----------------------------------------------------------------------------------------------------------------------------------------------------------------------------------------------------------------------------------------------------------------------------------------------------------------------------------------------------------------------------------------------------------------------------------------------------------------------------------------------------------------------------------------------------------------------------------------------------------------------------------------------------------------------------------------------------------------------------------------------------------------------------------------------------------------------------------------------------------------------------------------------------------------------------------------------------------------------------------------------------------------------------------------------------------------------------------------------------------------------------------------------------------|
| <p>cttcctaaatgattctt<br/> aaatggttggaaggccat<br/> cttctccagagatctc<br/> aaactctctcatcaatqa<br/> qoictaaacttccaaac<br/> aaaccacacagcaatgga<br/> ggacatcatagtaacc<br/> atactaccctccaatqaa<br/> acaaqtttaacttqaact<br/> ccaacaagaaggaaactt<br/> gcagaatggtacagacaat<br/> cccatācaaacatqtaaa<br/> qatācaaacatcaaaq<br/> ttgcaaaagacagaccat<br/> tgataccaccgagattgga<br/> ttqcatattctaattcc<br/> aaacatccaaccctaaac<br/> ccaacttaactaaatcc<br/> cactggtgctggaatttc<br/> attgtcaagattgtagcg<br/> caacatctcaacaatc<br/> ccqtaaaacacacatca<br/> ggttgacagaataacagac<br/> ttttggaaccgacatacc<br/> atcaacatqaaacqgata<br/> accatcaacaacaabaq<br/> caaccagttttgtagcg<br/> taaaagccaacagaccatg<br/> ccaqaaacaataaaatqat<br/> qtaaccagttqaaacact</p> | <p>cccatcacaactcaacatq<br/> ctgctacgctaaactcaga<br/> gctataccagatgaaactg<br/> ccttqatācccaaaact<br/> qccctatctatcttqoq<br/> qatccacactgcatgga<br/> aaactgctagagagcgtaa<br/> tttoatctactaatcaacc<br/> qtaccattatqacaaccc<br/> ttctctgctcatctgtag<br/> tacagatctactgctatgg<br/> aaactcctcaacaacaac<br/> catcactccaccccttat<br/> tcattactggtactggtg<br/> ctgctgctgattctgatt<br/> cqoqtqatātaaacatq<br/> qctqatctcaatctactt<br/> qtaactqaaatcaqtaaaq<br/> ccaagaactctgcaaaq<br/> qgttgaaagactctac<br/> caotātaaaacacatqcaa<br/> cacaacaaacaatqcaaa<br/> taagtggaaactgctgctg<br/> atcctattgggtgggctg<br/> aaqoqtatqacaatqta<br/> qctaaatqatqcaatq<br/> cctctactggtgctgct<br/> aaatggaagatgctcat<br/> qtaactccatctctct<br/> cctqatātaactcttac<br/> qcaaacctctactactat</p> | <p>GAT ATG CTT AAG TTC AGC GGG TAC TCC TAC CTG ATT TGA GGT C</p> | <p>caqaqqaqaaacqaaltt<br/> ttgtgctaaagtgaagg<br/> cgctgattgtagatgtcc<br/> qaaaacatāccaaqtatq<br/> caacttccatctctaa<br/> ggactgcaacggaat<br/> gaactctttgtggatg<br/> qattqaaatāacqtaaa<br/> caacaatqatctqat<br/> tccaagaatccctaaat<br/> gttcgagaagctgtaac<br/> qcaactctctctctt<br/> qaacactqatcttāaaq<br/> cctgagctcaataatgag<br/> attgacgaccttagtact<br/> tttcaatqatāatqaa<br/> qaacaaatqaaatqaa<br/> caaaqaaqaaacccctt<br/> ccgcttccaaatgagact<br/> gagctgcaaccccaata<br/> qatcaactttctcaact<br/> caccacqatātaacc<br/> acaccgctctcaactaa<br/> taccactctctcttga<br/> caqctttctaaacqat<br/> tccttqatqatqatqta<br/> catttgcagctccacgct<br/> cctgagctcaataatgag<br/> qatcaactttctcaact<br/> qattqaaatāaaqaaac<br/> cccccttcaatqaaat<br/> ctaaccttccacacqta<br/> cagttgtgtagcctg<br/> ctācaacaacacqatq<br/> tqaattcccaataccca<br/> ctcccacttctatata<br/> cctgagaacgaatgct<br/> ggcacatgtgggtcaaaa<br/> ccaaacatqctctctat<br/> cgaactqaaacacqat<br/> tgaacgactgattctcc<br/> ccaagaagcaccacgctt<br/> qactctāaaactctca<br/> qtaactctctcaact<br/> cagccattgtcaagtaac<br/> ctcaactctcactgag<br/> cctcaacaaatqaaac<br/> ccctqatāacttaccac<br/> tcatgagcaatgcaact</p> |
